# Supplementary material for: A facile route to the synthesis of reduced graphene oxide-wrapped octahedral Cu2O with enhanced photocatalytic and photovoltaic performance
Source: Royal Society of Chemistry journal article supplement (doi:10.1039/c5ta05508c), 2015-01-01
Supplement: c5ta05508c1.pdf [file c5ta05508c1.pdf]

## Supplementary Materials

### A facile route to reduced graphene oxide-wrapped octahedral Cu<sub>2</sub>O with enhanced photocatalytic and photovoltaic performance

Xueqin Liu,<sup>ab</sup> Zhen Li,<sup>\*a</sup> Wen Zhao,<sup>a</sup> Caixin Zhao,<sup>a</sup> Yang Wang,<sup>a</sup> and Zhiqun Lin<sup>\*b</sup>

- Faculty of Materials Science and chemistry, China University of Geosciences, Wuhan, Hubei 430074, China. E-mail: [zhenli@cug.edu.cn](mailto:zhenli@cug.edu.cn)
- School of Materials Science and Engineering, Georgia Institute of Technology, Atlanta, GA 30332, USA. E-mail: [zhiqun.lin@mse.gatech.edu](mailto:zhiqun.lin@mse.gatech.edu)

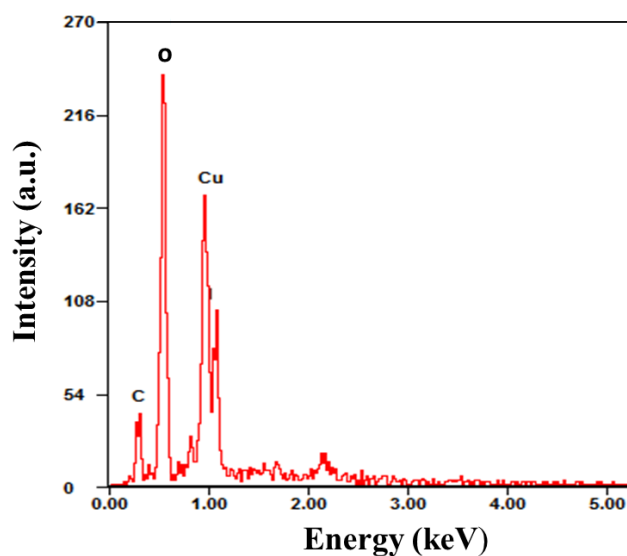

**Figure S1.** EDX spectrum of as-prepared rGO/Cu<sub>2</sub>O composites (GCCs).

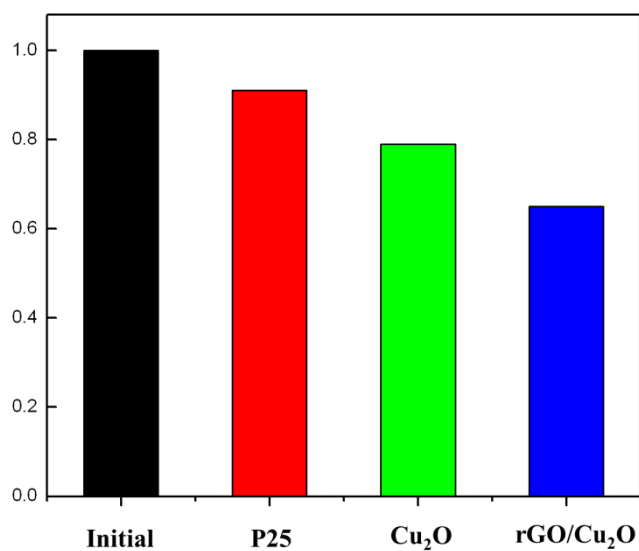

**Figure S2.** Bar graph showing the remaining MO in solution: initial and equilibrated with P25, Cu<sub>2</sub>O, and GCCs in the dark after a 30-min stirring.
